# Supplementary material for: The dynamic action of SecA during the initiation of protein translocation
Source: PubMed Central journal article supplement (PMC3685266; doi:10.1042/bj20121314), 2013-01-09
Supplement: bj4490695add.pdf [file bj4490695add.pdf]

**SUPPLEMENTARY ONLINE DATA****The dynamic action of SecA during the initiation of protein translocation**Vicki A. M. GOLD<sup>1</sup>, Sarah WHITEHOUSE, Alice ROBSON and Ian COLLINSON<sup>2</sup>

School of Biochemistry, University of Bristol, University Walk, Bristol BS8 1TD, U.K.

**MATERIALS AND METHODS****Steady-state ATPase and determination of the  $K_m$** 

Steady-state SecA ATPase measurements were performed as described previously [1,2] with various concentrations of ATP. The  $K_m$  and  $V_{max}$  ( $k_{cat}$ ) were determined by fitting the data to the Michaelis–Menten equation (eqn S1)

$$v = \frac{V_{max} \cdot [S]}{K_m + [S]}$$

where  $v$  is equal to the enzyme velocity,  $V_{max}$  is the total capacity of the substrate-associated ATPase stimulation,  $[S]$  is the substrate concentration and  $K_m$  is the Michaelis constant.

<sup>1</sup> Present address: Max-Planck-Institute of Biophysics, Department of Structural Biology, Max-von-Laue-Strasse 3, D-60438 Frankfurt am Main, Germany

<sup>2</sup> To whom correspondence should be addressed (email [ian.collinson@bristol.ac.uk](mailto:ian.collinson@bristol.ac.uk)).

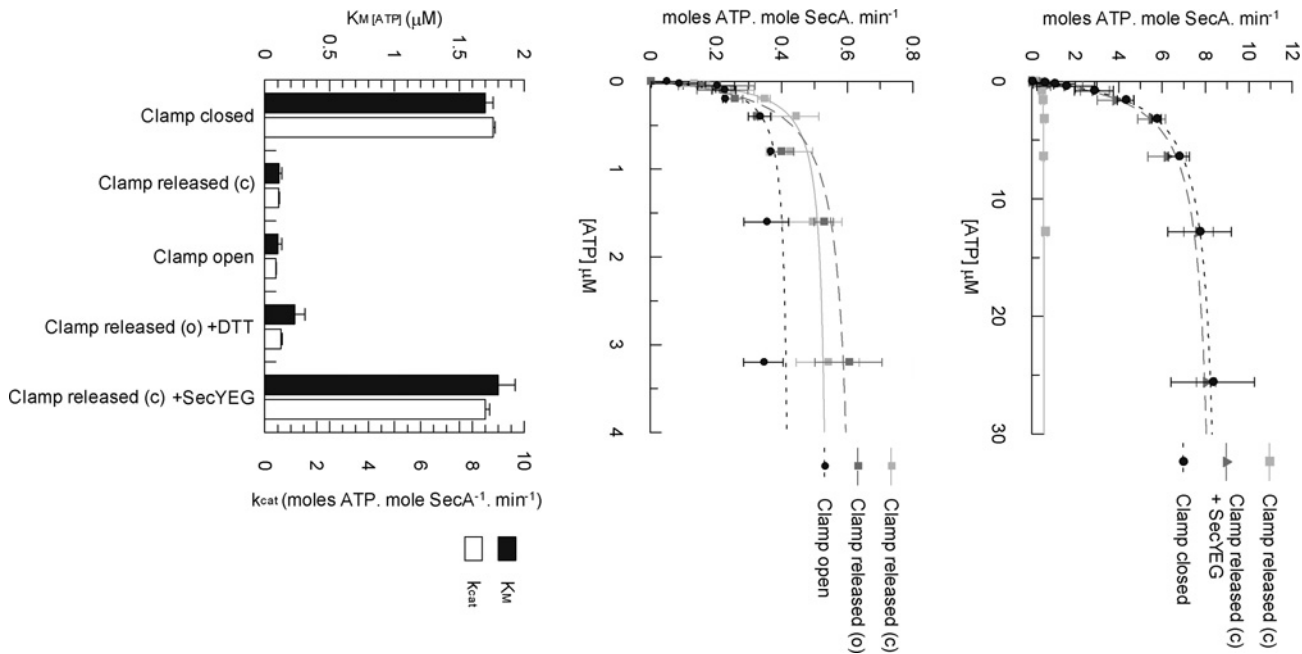**Table S1** Kinetic parameters

Various parameters derived from data fits (see individual Figure legends in the main text). The data for the clamp-closed SecA are shown in bold to emphasize the significant differences in this version. Errors represent S.D. values from the fit.

| Condition                   | SecA-SecYEG <sub>soluble</sub> |                             | SecA-SecYEG <sub>CL</sub>      |                             | SecA-ATP                       |                             | SecA <sub>(2HF)</sub> -SecY <sub>K268F</sub> EG <sub>soluble</sub> |                   | SecA-SecYEG <sub>vesicles</sub> |                              | [SecA-pOA]-SecYEG <sub>vesicles</sub> |                              | [SecA-SecYEG <sub>vesicles</sub> ]-pOA |                              |
|-----------------------------|--------------------------------|-----------------------------|--------------------------------|-----------------------------|--------------------------------|-----------------------------|--------------------------------------------------------------------|-------------------|---------------------------------|------------------------------|---------------------------------------|------------------------------|----------------------------------------|------------------------------|
|                             | 1<br><i>K<sub>d</sub></i> (μM) | 2<br><i>k<sub>cat</sub></i> | 3<br><i>K<sub>d</sub></i> (nM) | 4<br><i>k<sub>cat</sub></i> | 5<br><i>K<sub>m</sub></i> (μM) | 6<br><i>k<sub>cat</sub></i> | 7<br><i>K<sub>d</sub></i> (nM)                                     | 8<br>ΔFI (%)      | 9<br><i>K<sub>d</sub></i> (μM)  | 10<br><i>k<sub>cat</sub></i> | 11<br><i>K<sub>d</sub></i> (μM)       | 12<br><i>k<sub>cat</sub></i> | 13<br><i>K<sub>d</sub></i> (μM)        | 14<br><i>k<sub>cat</sub></i> |
| Δcys                        | 7.6 ± 0.6                      | 31.4 ± 0.6                  | 3.7 ± 1.9                      | 74.9 ± 3.5                  | -                              | -                           | 18.4 ± 0.6                                                         | 35.3 ± 0.2        | 1.13 ± 0.32                     | 154.2 ± 22.0                 | 0.26 ± 0.04                           | 656.4 ± 31.0                 | 0.50 ± 0.12                            | 605.8 ± 38.3                 |
| Δcys + DTT                  | 7.8 ± 1.4                      | 25.0 ± 1.1                  | 5.6 ± 0.6                      | 82.7 ± 0.9                  | -                              | -                           | 20.6 ± 2.1                                                         | 36.0 ± 1.3        | 1.11 ± 0.26                     | 149.4 ± 17.2                 | 0.19 ± 0.03                           | 631.6 ± 22.6                 | 0.78 ± 0.10                            | 604.6 ± 20.2                 |
| <b>Clamp closed</b>         | <b>0.015 ± 0.011</b>           | <b>23.2 ± 0.6</b>           | -                              | -                           | <b>1.7 ± 0.06</b>              | <b>8.8 ± 0.08</b>           | <b>28.6 ± 5.0</b>                                                  | <b>20.9 ± 1.4</b> | <b>0.029 ± 0.007</b>            | <b>99.7 ± 3.0</b>            | <b>0.025 ± 0.007</b>                  | <b>131.7 ± 4.5</b>           | -                                      | -                            |
| Clamp released (c)          | 6.3 ± 0.7                      | 22.5 ± 0.7                  | 8.8 ± 2.1                      | 59.1 ± 1.9                  | 0.11 ± 0.02                    | 0.54 ± 0.02                 | 117.7 ± 12.7                                                       | 23.5 ± 0.8        | 0.34 ± 0.20                     | 59.4 ± 8.2                   | 0.13 ± 0.02                           | 253.6 ± 10.0                 | 0.24 ± 0.06                            | 231.6 ± 13.3                 |
| Clamp open                  | 5.9 ± 2.1                      | 9.9 ± 0.5                   | -                              | -                           | 0.10 ± 0.03                    | 0.43 ± 0.02                 | 60.9 ± 10.0                                                        | 15.0 ± 0.6        | 0.65 ± 0.78                     | 22.5 ± 7.8                   | 0.17 ± 0.18                           | 21.1 ± 3.5                   | -                                      | -                            |
| Clamp released (o)          | 6.0 ± 1.4                      | 15.9 ± 0.6                  | 6.5 ± 0.9                      | 31.2 ± 0.4                  | 0.23 ± 0.08                    | 0.63 ± 0.05                 | 59.5 ± 6.4                                                         | 21.3 ± 0.6        | 0.65 ± 0.42                     | 29.9 ± 6.4                   | 0.13 ± 0.07                           | 90.3 ± 9.7                   | 0.35 ± 0.15                            | 50.5 ± 4.7                   |
| Clamp released (c) + SecYEG | -                              | -                           | -                              | -                           | 1.8 ± 0.13                     | 8.5 ± 0.17                  | -                                                                  | -                 | -                               | -                            | -                                     | -                            | -                                      | -                            |

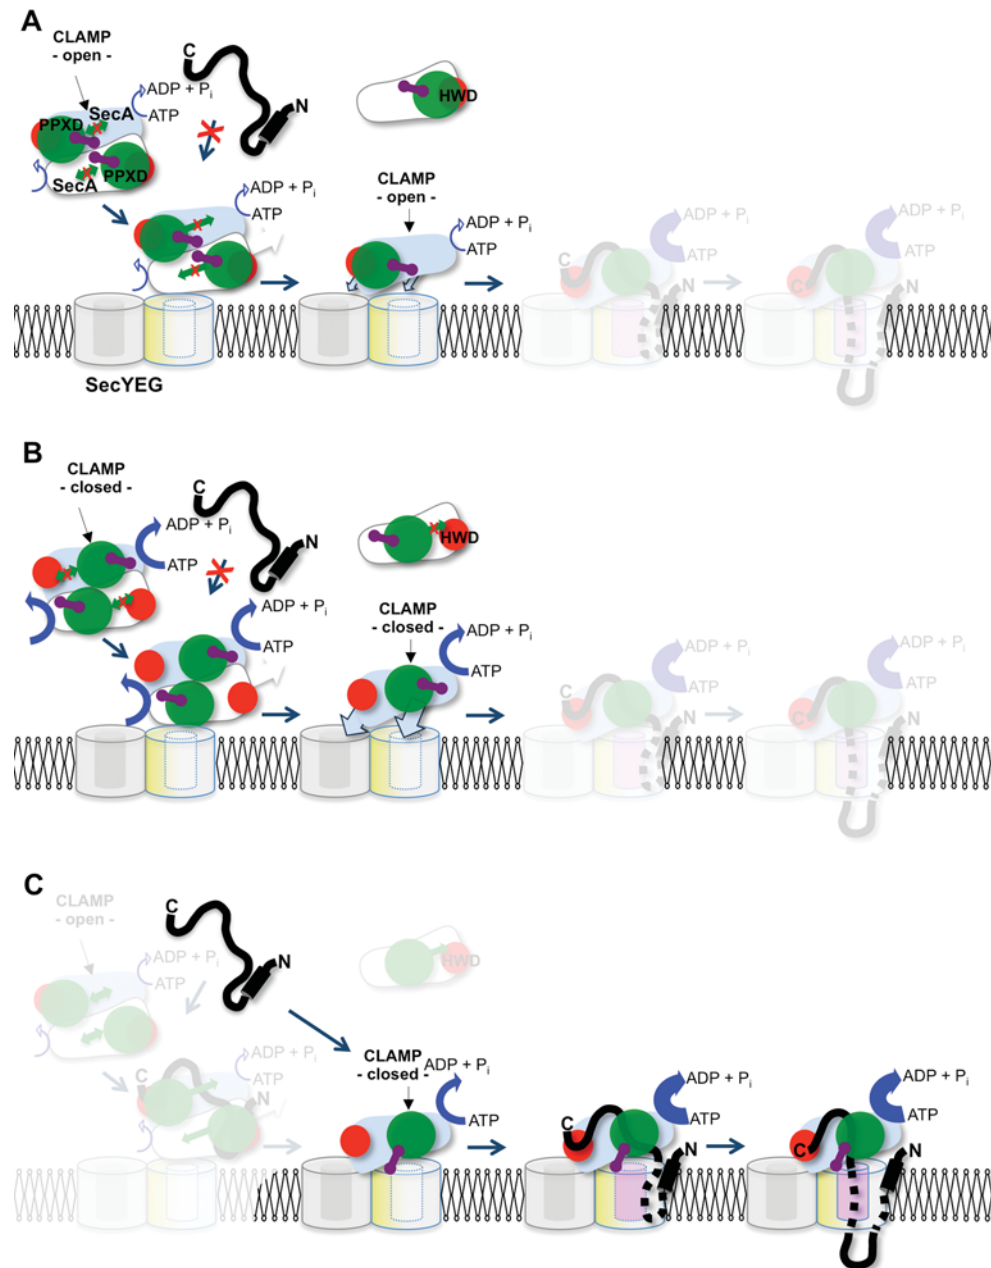

**Figure S2 The consequences of the immobilization of the PPXD within SecA to protein transport**

The model of pre-protein transport (Figure 7A of the main text) has been modified to incorporate the intra- and inter-molecular disulfide bonds, and to explain their effect on the activity. Colour co-ordination and labelling is as in Figure 7 of the main text. Stages of the mechanism precluded as a result have been fogged out. (A) When the PPXD is cross-linked (purple bar) to the HSD the clamp is permanently held open. This prevents the activation of the ATPase activity (thin blue arrows), maintains a low affinity for SecYEG (small pale blue arrows) and prevents association with the pre-protein. (B) Fixing the PPXD to NBD2, holding the clamp closed, activates the ATPase activity (blue arrows), brings about a high-affinity association with SecYEG (large pale blue arrows), but prevents the engagement of pre-protein. (C) The pre-activated cross-linked SecA–SecYEG complex is primed for translocation and capable of pre-protein intercalation and ATP-driven (thick blue arrows) translocation.

## REFERENCES

- Robson, A., Gold, V. A., Hodson, S., Clarke, A. R. and Collinson, I. (2009) Energy transduction in protein transport and the ATP hydrolytic cycle of SecA. *Proc. Natl. Acad. Sci. U.S.A.* **106**, 5111–5116
- Deville, K., Gold, V. A., Robson, A., Whitehouse, S., Sessions, R. B., Baldwin, S. A., Radford, S. E. and Collinson, I. (2011) The oligomeric state and arrangement of the active bacterial translocon. *J. Biol. Chem.* **286**, 4659–4669

Received 20 August 2012/15 October 2012; accepted 5 November 2012  
Published as BJ Immediate Publication 5 November 2012, doi:10.1042/BJ20121314
